# Supplementary material
Source: HighWire-hosted journal article supplement (https://cmaj.ca/highwire/filestream/149753/field_highwire_adjunct_files/2/221785-res-3-at.pdf)
Supplement: 221785-res-3-at.pdf [file 221785-res-3-at.pdf]

## Appendix C. Sensitivity Analysis

We conducted a series of two-way sensitivity analyses to assess the impact of alternative model assumptions. More specifically, we varied specific parameters to account for methodological uncertainty associated with assumptions made in the reference case.

**Table C1. Sensitivity analysis**

| Variable                                                                          | Δ Cost           | Δ QALYs |
|-----------------------------------------------------------------------------------|------------------|---------|
| <b>Base case</b>                                                                  | -\$956,461,149   | 74,023  |
| <b>Time horizon: 20 years</b>                                                     |                  |         |
| 1 year                                                                            | \$35,189,686     | 1,908   |
| 2 years                                                                           | -\$28,057,314    | 4,300   |
| 3 years                                                                           | -\$62,139,552    | 6,409   |
| 5 years                                                                           | -\$175,198,580   | 12,644  |
| 10 years                                                                          | -\$451,525,151   | 33,529  |
| 81 years (Lifetime)                                                               | -\$1,673,555,844 | 193,918 |
| <b>Discount (Cost &amp; Effect): 1.5%</b>                                         |                  |         |
| Cost and Effect: 0%                                                               | -\$1,082,186,439 | 85,793  |
| Cost and Effect: 5%                                                               | -\$669,156,924   | 53,446  |
| <b>Risk ratio of full remission: 1.46</b>                                         |                  |         |
| Lower bound: 1.02                                                                 | \$29,241,501     | 4,457   |
| Upper bound: 2.08                                                                 | -\$1,730,606,589 | 128,558 |
| <b>Risk Ratio of partial remission: 1.2</b>                                       |                  |         |
| Lower bound: 0.96                                                                 | -\$953,579,627   | 73,826  |
| Upper bound: 1.51                                                                 | -\$961,612,619   | 75,531  |
| <b>Risk Ratio of total discontinuation: 0.89</b>                                  |                  |         |
| Lower bound: 0.78                                                                 | -\$885,602,410   | 72,041  |
| Upper bound: 1.01                                                                 | -\$1,022,082,271 | 75,439  |
| <b>Risk Ratio of discontinuation due to adverse effect: 0.43</b>                  |                  |         |
| Lower bound: 0.16                                                                 | -\$1,009,941,161 | 74,708  |
| Upper bound: 1.17                                                                 | -\$793,716,025   | 71,441  |
| <b>Cost of PGx testing<sup>a</sup>: \$738</b>                                     |                  |         |
| Least expensive PGx testing <sup>1,b</sup> : \$305                                | -\$1,002,250,709 |         |
| Most expensive PGx testing <sup>1,b</sup> : \$2338                                | -\$693,415,396   |         |
| <b>Cost of treating patients with refractory MDD per year<sup>a</sup>: \$5286</b> |                  |         |
| 50% Decrease: \$2643                                                              | -\$138,909,139   |         |
| 50% Increase: \$7929                                                              | -\$1,726,844,871 |         |
| <b>Weekly cost of other medical conditions<sup>a</sup>: \$20</b>                  |                  |         |
| 50% Decrease: \$10                                                                | -\$962,208,348   |         |
| 50% Increase: \$30                                                                | -\$931,869,676   |         |

|                                                                           |                |        |
|---------------------------------------------------------------------------|----------------|--------|
| <b>Relative risk of mortality</b>                                         |                |        |
| <b>(MDD patients vs. general population): 1.58</b>                        |                |        |
| Lower bound: 1.31                                                         | -\$963,933,223 | 70,961 |
| Upper bound: 1.89                                                         | -\$940,383,630 | 75,449 |
| <b>Relative risk of mortality (Refractory MDD vs. episodic MDD): 1.29</b> |                |        |
| Lower bound: 1.22                                                         | -\$959,298,537 | 73,046 |
| Upper bound: 1.38                                                         | -\$923,454,035 | 75,315 |
| <b>Spontaneous remission of untreated<sup>a</sup>: 0.16</b>               |                |        |
| Lower bound: 0.12                                                         |                | 77,255 |
| Upper bound: 0.2                                                          |                | 70,576 |
| <b>Utility after remission<sup>a</sup>: 0.7</b>                           |                |        |
| Lower bound: 0.67                                                         |                | 66,677 |
| Upper bound: 0.73                                                         |                | 74,226 |
| <b>Utility of patients with refractory MDD<sup>a</sup>: 0.57</b>          |                |        |
| Lower bound: 0.52                                                         |                | 87,630 |
| Upper bound: 0.6                                                          |                | 64,551 |
| <b>Utility of patients in well health state<sup>a</sup>: 0.8</b>          |                |        |
| Lower bound: 0.7                                                          |                | 48,184 |
| Upper bound: 0.9                                                          |                | 98,492 |
| <b>Utility of patients with mild MDD<sup>a</sup>: 0.57</b>                |                |        |
| Lower bound: 0.54                                                         |                | 74,999 |
| Upper bound: 0.61                                                         |                | 70,972 |
| <b>Utility of patients with moderate MDD<sup>a</sup>: 0.52</b>            |                |        |
| Lower bound: 0.49                                                         |                | 73,743 |
| Upper bound: 0.56                                                         |                | 72,405 |
| <b>Utility of patients with severe MDD<sup>a</sup>: 0.39</b>              |                |        |
| Lower bound: 0.35                                                         |                | 72,815 |
| Upper bound: 0.43                                                         |                | 77,248 |

<sup>a</sup> Sensitivity analyses were done around the cost [and health utility] values in the model, which only impact variations in incremental costs [and QALYs], and so only these results are reported.

<sup>b</sup> Cost of PGx testing includes the cost of one regular appointment with a physician for a test request and one counseling appointment with a GP to review the results and assess the treatment plan.

## References

1. Maruf AA, Fan M, Arnold PD, Muller DJ, Aitchison KJ, Bousman CA. Pharmacogenetic Testing Options Relevant to Psychiatry in Canada: Options de tests pharmacogenetiques pertinents en psychiatrie au Canada. *Can J Psychiatry*. 2020 Aug;65(8):521-30.
